# Supplementary material for: Novel Plasma Metabolomic Markers Associated with Diabetes Progression in Older Puerto Ricans
Source: MDPI journal article supplement (doi:10.3390/metabo12060513), 2022-06-02
Supplement: s1 [file s1]

## SUPPLEMENTAL MATERIAL

**Supplemental Table S1.** Multivariable-adjusted pooled random-effects Incidence Rate Ratios (95% confidence intervals) for progression to type 2 diabetes and/or prediabetes, according to 1 standard deviation change in predefined clusters of metabolites in the San Juan Overweight Adult Longitudinal Study (SOALS) and Boston Puerto Rican Health Study (BPRHS) cohorts.

| Cluster name                                               | Number of included metabolites | Among all participants (n=1,221)    |         | Among participants with prediabetes at baseline (n=751) |         | Among participants with normal blood glucose concentration at baseline (n=459) |         | Among all participants (n=1,221)              |         |
|------------------------------------------------------------|--------------------------------|-------------------------------------|---------|---------------------------------------------------------|---------|--------------------------------------------------------------------------------|---------|-----------------------------------------------|---------|
|                                                            |                                | Progression to type 2 diabetes      |         | Progression to type 2 diabetes                          |         | Progression to prediabetes                                                     |         | Progression to prediabetes or type 2 diabetes |         |
|                                                            |                                | Multivariable-adjusted IRR (95% CI) | p-value | Multivariable-adjusted IRR (95% CI)                     | p-value | Multivariable-adjusted IRR (95% CI)                                            | p-value | Multivariable-adjusted IRR (95% CI)           | p-value |
| <b>Sphingolipids<sup>1</sup></b>                           | 18                             | 0.98 (0.60; 1.60)                   | 0.93    | 0.86 (0.60; 1.23)                                       | 0.41    | 1.01 (0.48; 2.14)                                                              | 0.97    | 0.85 (0.68; 1.07)                             | 0.16    |
| <b>BCAA Metabolism<sup>2</sup></b>                         | 15                             | 1.39 (0.92; 2.09)                   | 0.11    | 1.19 (0.76; 1.86)                                       | 0.44    | 1.30 (0.80; 2.10)                                                              | 0.29    | 1.15 (0.89; 1.48)                             | 0.28    |
| <b>BCAA and aromatic amino acid metabolism<sup>3</sup></b> | 13                             | 1.87 (1.28; 2.73)                   | 0.001   | 1.62 (1.09; 2.41)                                       | 0.02    | 1.19 (0.77; 1.82)                                                              | 0.44    | 1.22 (0.91; 1.5)                              | 0.19    |
| <b>Acyl cholines<sup>4</sup></b>                           | 9                              | 0.77 (0.55; 1.07)                   | 0.12    | 0.79 (0.55; 1.13)                                       | 0.19    | 0.95 (0.49; 1.84)                                                              | 0.88    | 0.88 (0.71; 1.08)                             | 0.23    |
| <b>Aromatic amino acid metabolism<sup>5</sup></b>          | 11                             | 0.96 (0.68; 1.33)                   | 0.79    | 0.88 (0.62; 1.26)                                       | 0.50    | 1.14 (0.64; 2.01)                                                              | 0.66    | 1.03 (0.75; 1.41)                             | 0.85    |
| <b>Cell membrane components<sup>6</sup></b>                | 8                              | 1.54 (1.04; 2.27)                   | 0.03    | 1.31 (0.87; 1.98)                                       | 0.20    | 1.12 (0.74; 1.71)                                                              | 0.59    | 1.26 (0.95; 1.67)                             | 0.11    |
| <b>Glucose transport<sup>7</sup></b>                       | 6                              | 1.27 (0.88; 1.83)                   | 0.20    | 1.13 (0.77; 1.66)                                       | 0.53    | 1.03 (0.40; 2.66)                                                              | 0.95    | 1.10 (0.60; 2.00)                             | 0.76    |
| <b>Fatty Acid Biosynthesis<sup>8</sup></b>                 | 6                              | 1.16 (0.91; 1.48)                   | 0.22    | 1.11 (0.86; 1.44)                                       | 0.43    | 1.06 (0.87; 1.29)                                                              | 0.54    | 1.02 (0.88; 1.19)                             | 0.77    |
| <b>Sugar Metabolism<sup>9</sup></b>                        | 5                              | 1.32 (0.90; 1.94)                   | 0.15    | 1.19 (0.80; 1.77)                                       | 0.38    | 0.93 (0.66; 1.30)                                                              | 0.67    | 1.01 (0.79; 1.29)                             | 0.91    |

Multivariable-adjusted Poisson regression models included the following confounders: age, sex, smoking, education, family history of diabetes (SOALS only), METs of physical activity (physical activity score in the BPRHS), waist circumference (cm), BMI (kg/m<sup>2</sup>), alcohol consumption (g/day), use of antihypertensive medications and statins or other lipid lowering medications. <sup>1</sup>Cluster included: sphingomyelin (d18:2/21:0, d16:2/23:0)\*, sphingomyelin (d18:2/23:0, d18:1/23:1, d17:1/24:1)\*, sphingomyelin (d18:2/23:1)\*, sphingomyelin (d18:2/16:0, d18:1/16:1)\*, sphingomyelin (d18:2/14:0, d18:1/14:1)\*, sphingomyelin (d18:1/22:1, d18:2/22:0, d16:1/24:1)\*, sphingomyelin (d17:2/16:0, d18:2/15:0)\*, sphingomyelin (d18:1/19:0, d19:1/18:0)\*, sphingomyelin (d18:1/22:2, d18:2/22:1, d16:1/24:2)\*, sphingomyelin (d18:1/18:1, d18:2/18:0), 5alpha-androstan-3alpha,17beta-diol disulfate, sphingomyelin (d17:1/16:0, d18:1/15:0, d16:1/17:0)\*, glycosyl-N-behenoyl-sphingadine (d18:2/22:0)\*, pyroglutamine\*, creatinine, guanidinoacetate, 5-oxoproline, N6-carbamoylthreonyladenosine. <sup>2</sup>Cluster included: formiminoglutamate, 3-hydroxyisobutyrate, hydantoin-5-propionic acid, kynurenate, urea, picolinate, N-acetylkynurenine (2), leucine, 2-amino adipate, glycine, N-acetylglucosaminylasparagine, 6-oxopiperidine-2-carboxylate, N6-acetyllysine, gamma-glutamylglycine, 3-methylcytidine. <sup>3</sup>Cluster included: 2-hydroxy-3-methylvalerate, indolelactate,

phenyllactate (PLA), alpha-hydroxyisocaproate, N6,N6,N6-trimethyllysine, 3-methyl-2-oxovalerate, phenylpyruvate, imidazole lactate, beta-hydroxyisovalerate, 4-methoxyphenol sulfate, 4-methyl-2-oxopentanoate, alpha-hydroxyisovalerate, 3-methyl-2-oxobutyrate. <sup>4</sup>Cluster included: 1-oleoyl-2-docosahexaenoyl-GPC (18:1/22:6)\*, docosahexaenoylcholine, arachidonoylcholine, stearoylcholine\*, eicosenoylcarnitine (C20:1)\*, palmitoylcholine, 3-(4-hydroxyphenyl)lactate, 1-palmitoleoyl-2-linolenoyl-GPC (16:1/18:3)\*, dihomol-2-linolenoylcholine (C20:2)\*. <sup>5</sup>Cluster included: phenylacetylglutamine, isovalerylglutamine, isobutyrylglutamine, indole-3-carboxylic acid, p-cresol-glucuronide\*, phenylacetylglutamate, phenylacetate, 3-methylglutaconate, 5alpha-androstan-3beta,17alpha-diol disulfate, L-urobilin, 3-hydroxy-3-methylglutarate. <sup>6</sup>Cluster included: 1-palmitoyl-2-palmitoleoyl-GPC (16:0/16:1)\*, N-acetylputrescine, 1-palmitoleoyl-GPC (16:1)\*, 2-palmitoleoyl-GPC (16:1)\*, sphingomyelin (d18:1/20:1, d18:2/20:0)\*, N1-methyladenosine, 7-methylguanine, sphingomyelin (d18:2/24:2)\*. <sup>7</sup>Cluster included: 1,2-dipalmitoyl-GPC (16:0/16:0), 1,5-anhydroglucitol (1,5-AG), 2-linoleoylglycerol (18:2), N-acetyltaurine, glycosyl-N-palmitoyl-sphingosine (d18:1/16:0), linoleoylcholine\*. <sup>8</sup>Cluster included: eicosenoate (20:1), 3-hydroxybutyrate (BHBA), 3-hydroxydecanoate, docosadienoate (22:2n6), 2-hydroxybutyrate/2-hydroxyisobutyrate, oleate/vaccenate (18:1). <sup>9</sup>Cluster included: maltose, glycerol 3-phosphate, mannitol/sorbitol, beta-citrylglutamate, phosphate.

**Supplemental Table S2.** Multivariable-adjusted Incidence Rate Ratios (95% confidence intervals) for progression to type 2 diabetes, according to 1 standard deviation change in predefined clusters of metabolites in the San Juan Overweight Adult Longitudinal Study (SOALS) and Boston Puerto Rican Health Study (BPRHS) cohorts.

| SOALS                                                |                                |                                     |         |                                                  |         |                                                             |         |                                               |         |
|------------------------------------------------------|--------------------------------|-------------------------------------|---------|--------------------------------------------------|---------|-------------------------------------------------------------|---------|-----------------------------------------------|---------|
| Cluster name                                         | Number of included metabolites | Among all participants (n=927)      |         | Among those with prediabetes at baseline (n=528) |         | Among those with normal glycemic levels at baseline (n=391) |         | Among all participants (n=927)                |         |
|                                                      |                                | Progression to type 2 diabetes      |         | Progression to type 2 diabetes                   |         | Progression to prediabetes                                  |         | Progression to prediabetes or type 2 diabetes |         |
|                                                      |                                | Multivariable-adjusted IRR (95% CI) | p-value | Multivariable-adjusted IRR (95% CI)              | p-value | Multivariable-adjusted IRR (95% CI)                         | p-value | Multivariable-adjusted IRR (95% CI)           | p-value |
| Sphingolipids <sup>1</sup>                           | 18                             | 0.79 (0.52;1.19)                    | 0.25    | 0.76 (0.48; 1.21)                                | 0.25    | 0.76 (0.57; 1.02)                                           | 0.06    | 0.80 (0.63; 1.01)                             | 0.06    |
| BCAA Metabolism <sup>2</sup>                         | 15                             | 1.63 (0.95; 2.78)                   | 0.07    | 1.39 (0.79; 2.47)                                | 0.26    | 1.10 (0.76; 1.59)                                           | 0.60    | 1.10 (0.81; 1.48)                             | 0.54    |
| BCAA and aromatic amino acid metabolism <sup>3</sup> | 13                             | 2.12 (1.29; 3.49)                   | 0.003   | 1.93 (1.12; 3.32)                                | 0.02    | 1.07 (0.77; 1.47)                                           | 0.70    | 1.09 (0.83; 1.44)                             | 0.52    |
| Acyl cholines <sup>4</sup>                           | 9                              | 0.81 (0.54; 1.24)                   | 0.33    | 0.84 (0.53; 1.33)                                | 0.45    | 0.72 (0.53; 0.98)                                           | 0.04    | 0.84 (0.66; 1.07)                             | 0.17    |
| Aromatic amino acid metabolism <sup>5</sup>          | 11                             | 0.90 (0.59; 1.38)                   | 0.64    | 0.82 (0.52; 1.29)                                | 0.39    | 0.90 (0.66; 1.23)                                           | 0.50    | 0.91 (0.71; 1.16)                             | 0.45    |

|                                       |   |                   |      |                   |      |                   |      |                   |      |
|---------------------------------------|---|-------------------|------|-------------------|------|-------------------|------|-------------------|------|
| Cell membrane components <sup>6</sup> | 8 | 1.53 (0.94; 2.51) | 0.09 | 1.40 (0.84; 2.34) | 0.20 | 1.01 (0.71; 1.45) | 0.95 | 1.15 (0.87; 1.52) | 0.33 |
| Glucose transport <sup>7</sup>        | 6 | 1.26 (0.81; 1.97) | 0.30 | 1.14 (0.72; 1.82) | 0.58 | 0.68 (0.48; 0.95) | 0.03 | 0.83 (0.64; 1.08) | 0.17 |
| Fatty Acid Biosynthesis <sup>8</sup>  | 6 | 1.25 (0.92; 1.71) | 0.16 | 1.15 (0.82; 1.61) | 0.42 | 1.07 (0.86; 1.32) | 0.55 | 1.06 (0.89; 1.27) | 0.49 |
| Sugar Metabolism <sup>9</sup>         | 5 | 1.40 (0.85; 2.33) | 0.19 | 1.26 (0.74; 2.15) | 0.40 | 0.94 (0.65; 1.36) | 0.75 | 0.95 (0.71; 1.27) | 0.71 |

(continued)

| BPRHS                                                |                                |                                     |         |                                                  |         |                                                            |         |                                        |         |
|------------------------------------------------------|--------------------------------|-------------------------------------|---------|--------------------------------------------------|---------|------------------------------------------------------------|---------|----------------------------------------|---------|
| Cluster name                                         | Number of included metabolites | Among all participants (n=294)      |         | Among those with prediabetes at baseline (n=223) |         | Among those with normal glycemic levels at baseline (n=68) |         | Among all participants (n=294)         |         |
|                                                      |                                | Progression to diabetes             |         | Progression to diabetes                          |         | Progression to prediabetes                                 |         | Progression to prediabetes or diabetes |         |
|                                                      |                                | Multivariable-adjusted IRR (95% CI) | p-value | Multivariable-adjusted IRR (95% CI)              | p-value | Multivariable-adjusted IRR (95% CI)                        | p-value | Multivariable-adjusted IRR (95% CI)    | p-value |
| Sphingolipids <sup>1</sup>                           | 18                             | 1.31 (0.75; 2.29)                   | 0.35    | 1.04 (0.57; 1.87)                                | 0.90    | 1.69 (0.70; 4.05)                                          | 0.24    | 1.04 (0.67; 1.60)                      | 0.87    |
| BCAA Metabolism <sup>2</sup>                         | 15                             | 1.12 (0.59; 2.10)                   | 0.73    | 0.94 (0.46; 1.91)                                | 0.85    | 1.87 (0.89; 3.92)                                          | 0.10    | 1.29 (0.81; 2.05)                      | 0.29    |
| BCAA and aromatic amino acid metabolism <sup>3</sup> | 13                             | 1.57 (0.87; 2.81)                   | 0.13    | 1.32 (0.73; 2.37)                                | 0.36    | 1.86 (0.74; 4.68)                                          | 0.19    | 1.51 (0.97; 2.33)                      | 0.07    |
| Acyl cholines <sup>4</sup>                           | 9                              | 0.70 (0.41; 1.20)                   | 0.19    | 0.70 (0.39; 1.25)                                | 0.23    | 1.43 (0.74; 2.79)                                          | 0.29    | 0.99 (0.65; 1.50)                      | 0.97    |
| Aromatic amino acid metabolism <sup>5</sup>          | 11                             | 1.04 (0.61; 1.77)                   | 0.88    | 1.00 (0.56; 1.78)                                | 1.00    | 1.63 (0.88; 3.02)                                          | 0.12    | 1.27 (0.85; 1.90)                      | 0.25    |
| Cell membrane components <sup>6</sup>                | 8                              | 1.55 (0.82; 2.92)                   | 0.18    | 1.17 (0.59; 2.31)                                | 0.66    | 1.74 (0.71; 4.26)                                          | 0.23    | 1.58 (0.96; 2.61)                      | 0.07    |

|                                      |   |                      |      |                      |      |                      |      |                      |      |
|--------------------------------------|---|----------------------|------|----------------------|------|----------------------|------|----------------------|------|
| Glucose transport <sup>7</sup>       | 6 | 1.28 (0.68;<br>2.42) | 0.44 | 1.11 (0.57;<br>2.16) | 0.76 | 1.81 (0.80;<br>4.06) | 0.15 | 1.55 (0.95;<br>2.51) | 0.08 |
| Fatty Acid Biosynthesis <sup>8</sup> | 6 | 1.04 (0.71;<br>1.54) | 0.84 | 1.06 (0.71;<br>1.58) | 0.78 | 1.04 (0.64;<br>1.69) | 0.89 | 0.92 (0.69;<br>1.23) | 0.57 |
| Sugar Metabolism <sup>9</sup>        | 5 | 1.22 (0.68;<br>2.18) | 0.51 | 1.12 (0.62;<br>2.02) | 0.70 | 0.87 (0.39;<br>1.96) | 0.73 | 1.20 (0.76;<br>1.87) | 0.43 |

Multivariable Poisson regression models included the following confounders: age, sex, smoking, education, family history of diabetes (SOALS only), METs of physical activity (physical activity score in the BPRHS), waist circumference (cm), BMI (kg/m<sup>2</sup>), alcohol consumption (g/day), use of antihypertensive medications and statins or other lipid lowering medications. <sup>1</sup>Cluster included: sphingomyelin (d18:2/21:0, d16:2/23:0)\*, sphingomyelin (d18:2/23:0, d18:1/23:1, d17:1/24:1)\*, sphingomyelin (d18:2/23:1)\*, sphingomyelin (d18:2/16:0, d18:1/16:1)\*, sphingomyelin (d18:2/14:0, d18:1/14:1)\*, sphingomyelin (d18:1/22:1, d18:2/22:0, d16:1/24:1)\*, sphingomyelin (d17:2/16:0, d18:2/15:0)\*, sphingomyelin (d18:1/19:0, d19:1/18:0)\*, sphingomyelin (d18:1/22:2, d18:2/22:1, d16:1/24:2)\*, sphingomyelin (d18:1/18:1, d18:2/18:0), 5alpha-androstan-3alpha,17beta-diol disulfate, sphingomyelin (d17:1/16:0, d18:1/15:0, d16:1/17:0)\*, glycosyl-N-behenoyl-sphingadienine (d18:2/22:0)\*, pyroglutamine\*, creatinine, guanidinoacetate, 5-oxoproline, N6-carbamoylthreonyladenosine. <sup>2</sup>Cluster included: formiminoglutamate, 3-hydroxyisobutyrate, hydantoin-5-propionic acid, kynurenate, urea, picolinate, N-acetylkynurenine (2), leucine, 2-aminoadipate, glycine, N-acetylglucosaminylasparagine, 6-oxopiperidine-2-carboxylate, N6-acetyllysine, gamma-glutamylglycine, 3-methylcytidine. <sup>3</sup>Cluster included: 2-hydroxy-3-methylvalerate, indolelactate, phenyllactate (PLA), alpha-hydroxyisocaproate, N6,N6,N6-trimethyllysine, 3-methyl-2-oxovalerate, phenylpyruvate, imidazole lactate, beta-hydroxyisovalerate, 4-methoxyphenol sulfate, 4-methyl-2-oxopentanoate, alpha-hydroxyisovalerate, 3-methyl-2-oxobutyrate. <sup>4</sup>Cluster included: 1-oleoyl-2-docosahexaenoyl-GPC (18:1/22:6)\*, docosahexaenoylcholine, arachidonoylcholine, stearoylcholine\*, eicosenoylcarnitine (C20:1)\*, palmitoylcholine, 3-(4-hydroxyphenyl)lactate, 1-palmitoleoyl-2-linolenoyl-GPC (16:1/18:3)\*, dihomol-oleoylcarnitine (C20:2)\*. <sup>5</sup>Cluster included: phenylacetylglutamine, isovalerylglutamine, isobutyrylglutamine, indole-3-carboxylic acid, p-cresol-glucuronide\*, phenylacetylglutamate, phenylacetate, 3-methylglutaconate, 5alpha-androstan-3beta,17alpha-diol disulfate, L-urobilin, 3-hydroxy-3-methylglutarate. <sup>6</sup>Cluster included: 1-palmitoyl-2-palmitoleoyl-GPC (16:0/16:1)\*, N-acetylputrescine, 1-palmitoleoyl-GPC (16:1)\*, 2-palmitoleoyl-GPC (16:1)\*, sphingomyelin (d18:1/20:1, d18:2/20:0)\*, N1-methyladenosine, 7-methylguanine, sphingomyelin (d18:2/24:2)\*. <sup>7</sup>Cluster included: 1,2-dipalmitoyl-GPC (16:0/16:0), 1,5-anhydroglucitol (1,5-AG), 2-linoleoylglycerol (18:2), N-acetyltaurine, glycosyl-N-palmitoyl-sphingosine (d18:1/16:0), linoleoylcholine\*. <sup>8</sup>Cluster included: eicosenoate (20:1), 3-hydroxybutyrate (BHBA), 3-hydroxydecanoate, docosadienoate (22:2n6), 2-hydroxybutyrate/2-hydroxyisobutyrate, oleate/vaccenate (18:1). <sup>9</sup>Cluster included: maltose, glycerol 3-phosphate, mannitol/sorbitol, beta-citrylglutamate, phosphate.

**Supplemental Table S3.** Incidence Rate Ratios (95% confidence intervals) for progression to type 2 diabetes, according to 1 standard deviation change in each metabolite in the San Juan Overweight Adult Longitudinal Study (SOALS).

| Metabolite             | Model 1<br>IRR (95% CI) | FDR p-<br>value | Model 2<br>IRR (95% CI) | FDR p-<br>value | Model 3<br>IRR (95% CI) | FDR p-<br>value | SUPER-PATH-<br>WAY | SUB-PATHWAY                                       |
|------------------------|-------------------------|-----------------|-------------------------|-----------------|-------------------------|-----------------|--------------------|---------------------------------------------------|
| 3-methyl-2-oxovalerate | 1.77 (1.32; 2.39)       | 0.006           | 1.90 (1.4; 2.57)        | 0.005           | 1.87 (1.38; 2.54)       | 0.006           | Amino Acid         | Leucine, Isoleucine<br>and Valine Metabo-<br>lism |
| 3-methyl-2-oxobutyrate | 1.68 (1.28; 2.20)       | 0.006           | 1.74 (1.31; 2.31)       | 0.006           | 1.74 (1.30; 2.31)       | 0.008           | Amino Acid         | Leucine, Isoleucine<br>and Valine Metabo-<br>lism |

|                                                 |                   |       |                   |       |                   |       |            |                                             |
|-------------------------------------------------|-------------------|-------|-------------------|-------|-------------------|-------|------------|---------------------------------------------|
| 1-palmitoyl-2-palmitoleoyl-GPC<br>(16:0/16:1)*  | 1.64 (1.29; 2.08) | 0.006 | 1.59 (1.24; 2.03) | 0.007 | 1.59 (1.24; 2.03) | 0.009 | Lipid      | Phosphatidylcholine (PC)                    |
| 4-methyl-2-oxopentanoate                        | 1.61 (1.19; 2.18) | 0.03  | 1.73 (1.27; 2.38) | 0.02  | 1.72 (1.25; 2.36) | 0.02  | Amino Acid | Leucine, Isoleucine and Valine Metabolism   |
| 5-oxoproline                                    | 1.48 (1.16; 1.88) | 0.03  | 1.51 (1.18; 1.94) | 0.02  | 1.50 (1.17; 1.93) | 0.02  | Amino Acid | Glutathione Metabolism                      |
| 2-hydroxy-3-methylvalerate                      | 1.64 (1.23; 2.18) | 0.02  | 1.63 (1.21; 2.19) | 0.02  | 1.62 (1.2; 2.18)  | 0.02  | Amino Acid | Leucine, Isoleucine and Valine Metabolism   |
| isoleucine                                      | 1.47 (1.12; 1.91) | 0.03  | 1.52 (1.16; 2.00) | 0.03  | 1.52 (1.15; 2.00) | 0.03  | Amino Acid | Leucine, Isoleucine and Valine Metabolism   |
| ornithine                                       | 1.43 (1.12; 1.81) | 0.03  | 1.45 (1.13; 1.86) | 0.03  | 1.47 (1.14; 1.90) | 0.03  | Amino Acid | Urea cycle; Arginine and Proline Metabolism |
| 3-hydroxyisobutyrate                            | 1.49 (1.14; 1.93) | 0.03  | 1.51 (1.16; 1.97) | 0.03  | 1.49 (1.14; 1.95) | 0.03  | Amino Acid | Leucine, Isoleucine and Valine Metabolism   |
| sphingomyelin (d18:1/20:1, d18:2/20:0)*         | 0.66 (0.51; 0.86) | 0.03  | 0.67 (0.51; 0.87) | 0.03  | 0.66 (0.51; 0.87) | 0.03  | Lipid      | Sphingolipid Metabolism                     |
| sphingomyelin (d18:2/24:2)*                     | 0.68 (0.53; 0.88) | 0.03  | 0.66 (0.51; 0.87) | 0.03  | 0.67 (0.51; 0.87) | 0.03  | Lipid      | Sphingolipid Metabolism                     |
| leucine                                         | 1.5 (1.14; 1.97)  | 0.03  | 1.57 (1.18; 2.09) | 0.03  | 1.57 (1.18; 2.09) | 0.03  | Amino Acid | Leucine, Isoleucine and Valine Metabolism   |
| formiminoglutamate                              | 1.54 (1.17; 2.03) | 0.03  | 1.52 (1.14; 2.02) | 0.04  | 1.52 (1.14; 2.02) | 0.03  | Amino Acid | Histidine Metabolism                        |
| 1-oleoyl-2-docosaheptaenoyl-GPC<br>(18:1/22:6)* | 0.69 (0.54; 0.88) | 0.03  | 0.69 (0.53; 0.9)  | 0.04  | 0.68 (0.52; 0.89) | 0.03  | Lipid      | Phosphatidylcholine (PC)                    |
| valine                                          | 1.43 (1.1; 1.86)  | 0.05  | 1.48 (1.13; 1.94) | 0.04  | 1.47 (1.12; 1.94) | 0.04  | Amino Acid | Leucine, Isoleucine and Valine Metabolism   |

|                                                     |                   |      |                   |      |                   |      |            |                                           |
|-----------------------------------------------------|-------------------|------|-------------------|------|-------------------|------|------------|-------------------------------------------|
| tyrosine                                            | 1.42 (1.11; 1.81) | 0.03 | 1.37 (1.07; 1.75) | 0.06 | 1.38 (1.08; 1.77) | 0.07 | Amino Acid | Tyrosine metabolism                       |
| alpha-hydroxyisovalerate                            | 1.47 (1.12; 1.92) | 0.04 | 1.45 (1.09; 1.92) | 0.06 | 1.44 (1.09; 1.91) | 0.07 | Amino Acid | Leucine, Isoleucine and Valine Metabolism |
| 2-hydroxybutyrate/2-hydroxyisobutyrate              | 1.38 (1.07; 1.78) | 0.07 | 1.43 (1.1; 1.86)  | 0.05 | 1.41 (1.08; 1.83) | 0.07 | Amino Acid | Glutathione Metabolism                    |
| 3-(4-hydroxyphenyl) lactate (HPLA)                  | 1.4 (1.06; 1.84)  | 0.08 | 1.45 (1.09; 1.94) | 0.06 | 1.44 (1.07; 1.92) | 0.08 | Amino Acid | Tyrosine Metabolism                       |
| 2-aminoadipate                                      | 1.42 (1.09; 1.84) | 0.05 | 1.42 (1.08; 1.86) | 0.07 | 1.4 (1.06; 1.84)  | 0.09 | Amino Acid | Lysine Metabolism                         |
| alpha-hydroxyisocaproate                            | 1.41 (1.04; 1.91) | 0.12 | 1.48 (1.08; 2.03) | 0.08 | 1.47 (1.07; 2.02) | 0.09 | Amino Acid | Leucine, Isoleucine and Valine Metabolism |
| imidazole lactate                                   | 0.76 (0.59; 0.98) | 0.14 | 0.75 (0.58; 0.98) | 0.14 | 0.74 (0.57; 0.97) | 0.13 | Amino Acid | Histidine Metabolism                      |
| docosadienoate (22:2n6)                             | 1.36 (1.07; 1.73) | 0.06 | 1.33 (1.04; 1.7)  | 0.10 | 1.32 (1.03; 1.68) | 0.13 | Lipid      | Polyunsaturated Fatty Acid (n3 and n6)    |
| isovalerylglycine                                   | 0.76 (0.59; 0.96) | 0.10 | 0.76 (0.59; 0.98) | 0.14 | 0.76 (0.59; 0.98) | 0.14 | Amino Acid | Leucine, Isoleucine and Valine Metabolism |
| glycine                                             | 0.74 (0.58; 0.95) | 0.08 | 0.76 (0.59; 0.98) | 0.14 | 0.76 (0.59; 0.98) | 0.14 | Amino Acid | Glycine, Serine and Threonine Metabolism  |
| 2-palmitoleoyl-GPC* (16:1)*                         | 1.29 (1.02; 1.64) | 0.14 | 1.29 (1.02; 1.64) | 0.14 | 1.29 (1.01; 1.64) | 0.15 | Lipid      | Lysophospholipid                          |
| sphingomyelin (d18:1/22:2, d18:2/22:1, d16:1/24:2)* | 0.77 (0.6; 0.99)  | 0.17 | 0.75 (0.58; 0.98) | 0.14 | 0.76 (0.58; 0.99) | 0.16 | Lipid      | Sphingolipid Metabolism                   |
| N6,N6,N6-trimethyllysine                            | 1.25 (0.97; 1.62) | 0.26 | 1.3 (1; 1.69)     | 0.18 | 1.29 (1.00; 1.68) | 0.20 | Amino Acid | Lysine Metabolism                         |
| 3-methylglutaconate                                 | 1.24 (0.97; 1.6)  | 0.26 | 1.32 (1.01; 1.72) | 0.15 | 1.30 (0.99; 1.70) | 0.20 | Amino Acid | Leucine, Isoleucine and Valine Metabolism |
| betaine                                             | 0.81 (0.63; 1.04) | 0.28 | 0.79 (0.61; 1.02) | 0.24 | 0.79 (0.61; 1.02) | 0.25 | Amino Acid | Glycine, Serine and Threonine Metabolism  |

|                                                     |                   |      |                   |      |                   |      |              |                                      |
|-----------------------------------------------------|-------------------|------|-------------------|------|-------------------|------|--------------|--------------------------------------|
| indolelactate                                       | 1.25 (0.95; 1.65) | 0.28 | 1.29 (0.97; 1.71) | 0.24 | 1.28 (0.96; 1.69) | 0.26 | Amino Acid   | Tryptophan Metabolism                |
| 2-linoleoylglycerol (18:2)                          | 1.27 (0.99; 1.62) | 0.21 | 1.25 (0.98; 1.6)  | 0.24 | 1.25 (0.97; 1.60) | 0.26 | Lipid        | Monoacylglycerol                     |
| trimethylamine N-oxide                              | 1.23 (0.97; 1.57) | 0.26 | 1.25 (0.98; 1.6)  | 0.24 | 1.24 (0.97; 1.59) | 0.26 | Lipid        | Phospholipid Metabolism              |
| hydantoin-5-propionate                              | 1.23 (0.96; 1.58) | 0.27 | 1.28 (0.98; 1.67) | 0.23 | 1.26 (0.97; 1.64) | 0.26 | Amino Acid   | Histidine Metabolism                 |
| sphingomyelin (d18:1/22:1, d18:2/22:0, d16:1/24:1)* | 0.79 (0.62; 1.02) | 0.24 | 0.79 (0.61; 1.03) | 0.24 | 0.80 (0.61; 1.03) | 0.26 | Lipid        | Sphingolipid Metabolism              |
| sphingomyelin (d18:2/23:0, d18:1/23:1, d17:1/24:1)* | 0.77 (0.59; 1.01) | 0.22 | 0.78 (0.59; 1.03) | 0.24 | 0.78 (0.59; 1.04) | 0.27 | Lipid        | Sphingolipid Metabolism              |
| sphingomyelin (d18:2/23:1)*                         | 0.81 (0.62; 1.05) | 0.28 | 0.79 (0.60; 1.04) | 0.24 | 0.79 (0.60; 1.04) | 0.28 | Lipid        | Sphingolipid Metabolism              |
| sphingomyelin (d18:2/21:0, d16:2/23:0)*             | 0.78 (0.59; 1.04) | 0.26 | 0.78 (0.57; 1.05) | 0.28 | 0.78 (0.58; 1.05) | 0.29 | Lipid        | Sphingolipid Metabolism              |
| oleate/vaccenate (18:1)                             | 1.26 (0.99; 1.6)  | 0.22 | 1.22 (0.95; 1.56) | 0.31 | 1.20 (0.94; 1.54) | 0.37 | Lipid        | Long Chain Fatty Acid                |
| docosahexaenoylcholine                              | 0.82 (0.64; 1.04) | 0.28 | 0.84 (0.66; 1.07) | 0.38 | 0.83 (0.66; 1.06) | 0.37 | Lipid        | Fatty Acid Metabolism (Acyl Choline) |
| 1,2-dipalmitoyl-GPC (16:0/16:0)                     | 1.19 (0.93; 1.51) | 0.40 | 1.19 (0.93; 1.52) | 0.42 | 1.20 (0.93; 1.54) | 0.38 | Lipid        | Phosphatidylcholine (PC)             |
| arachidonoylcholine                                 | 0.84 (0.66; 1.07) | 0.38 | 0.84 (0.66; 1.07) | 0.38 | 0.84 (0.66; 1.07) | 0.38 | Lipid        | Fatty Acid Metabolism (Acyl Choline) |
| eicosenoate (20:1n9 or 1n11)                        | 1.23 (0.97; 1.57) | 0.26 | 1.2 (0.94; 1.54)  | 0.37 | 1.19 (0.93; 1.52) | 0.41 | Lipid        | Long Chain Fatty Acid                |
| 1-palmitoleoyl-GPC* (16:1)*                         | 1.16 (0.92; 1.48) | 0.46 | 1.19 (0.93; 1.52) | 0.38 | 1.19 (0.93; 1.51) | 0.41 | Lipid        | Lysophospholipid                     |
| N6-acetyllysine                                     | 0.87 (0.68; 1.11) | 0.49 | 0.85 (0.66; 1.1)  | 0.49 | 0.85 (0.66; 1.09) | 0.45 | Amino Acid   | Lysine Metabolism                    |
| N-acetylglucosaminylasparagine                      | 0.89 (0.7; 1.13)  | 0.54 | 0.86 (0.67; 1.1)  | 0.50 | 0.86 (0.67; 1.10) | 0.50 | Carbohydrate | Aminosugar Metabolism                |
| gamma-glutamylglycine                               | 0.83 (0.65; 1.07) | 0.38 | 0.85 (0.65; 1.1)  | 0.49 | 0.85 (0.65; 1.11) | 0.50 | Peptide      | Gamma-glutamyl Amino Acid            |
| glycerol 3-phosphate                                | 1.14 (0.9; 1.44)  | 0.50 | 1.16 (0.91; 1.48) | 0.49 | 1.16 (0.91; 1.48) | 0.51 | Lipid        | Glycerolipid Metabolism              |

|                                               |                   |      |                   |      |                   |      |            |                                       |
|-----------------------------------------------|-------------------|------|-------------------|------|-------------------|------|------------|---------------------------------------|
| phenyllactate (PLA)                           | 1.15 (0.87; 1.52) | 0.55 | 1.17 (0.88; 1.55) | 0.52 | 1.16 (0.87; 1.54) | 0.54 | Amino Acid | Phenylalanine Metabolism              |
| 5alpha-androstan-3alpha,17beta-diol disulfate | 1.19 (0.87; 1.64) | 0.50 | 1.18 (0.86; 1.62) | 0.53 | 1.19 (0.87; 1.64) | 0.54 | Lipid      | Androgenic Steroids                   |
| 5alpha-androstan-3beta,17alpha-diol disulfate | 0.86 (0.67; 1.1)  | 0.47 | 0.87 (0.67; 1.12) | 0.52 | 0.87 (0.67; 1.12) | 0.54 | Lipid      | Androgenic Steroids                   |
| N-acetylputrescine                            | 1.16 (0.91; 1.47) | 0.47 | 1.14 (0.89; 1.47) | 0.52 | 1.14 (0.89; 1.46) | 0.54 | Amino Acid | Polyamine Metabolism                  |
| phosphate                                     | 1.14 (0.89; 1.45) | 0.50 | 1.14 (0.89; 1.46) | 0.52 | 1.14 (0.89; 1.45) | 0.54 | Energy     | Oxidative Phosphorylation             |
| 1-palmitoleoyl-2-linolenoyl-GPC (16:1/18:3)*  | 1.15 (0.89; 1.48) | 0.50 | 1.15 (0.88; 1.49) | 0.52 | 1.15 (0.88; 1.49) | 0.54 | Lipid      | Phosphatidylcholine (PC)              |
| phenylpyruvate                                | 1.18 (0.91; 1.53) | 0.44 | 1.17 (0.9; 1.52)  | 0.51 | 1.15 (0.88; 1.50) | 0.54 | Amino Acid | Phenylalanine Metabolism              |
| glycosyl-N-behenoyl-sphingadine (d18:2/22:0)* | 0.85 (0.67; 1.08) | 0.44 | 0.87 (0.68; 1.1)  | 0.51 | 0.87 (0.68; 1.12) | 0.54 | Lipid      | Ceramides                             |
| linoleoylcholine*                             | 0.87 (0.68; 1.10) | 0.49 | 0.88 (0.69; 1.12) | 0.52 | 0.88 (0.69; 1.12) | 0.54 | Lipid      | Fatty Acid Metabolism (Acyl Choline)  |
| stearoylcholine*                              | 0.87 (0.68; 1.11) | 0.50 | 0.88 (0.69; 1.13) | 0.53 | 0.88 (0.69; 1.13) | 0.54 | Lipid      | Fatty Acid Metabolism (Acyl Choline)  |
| sphingomyelin (d17:2/16:0, d18:2/15:0)*       | 0.87 (0.67; 1.14) | 0.54 | 0.85 (0.64; 1.13) | 0.52 | 0.85 (0.64; 1.14) | 0.54 | Lipid      | Sphingolipid Metabolism               |
| phenylalanine                                 | 1.15 (0.90; 1.48) | 0.50 | 1.15 (0.88; 1.49) | 0.52 | 1.15 (0.88; 1.50) | 0.54 | Amino Acid | Phenylalanine metabolism              |
| carnitine                                     | 1.18 (0.93; 1.51) | 0.40 | 1.15 (0.9; 1.48)  | 0.52 | 1.13 (0.88; 1.46) | 0.55 | Lipid      | Carnitine metabolism                  |
| fumarate                                      | 0.87 (0.68; 1.12) | 0.50 | 0.9 (0.7; 1.16)   | 0.62 | 0.89 (0.69; 1.14) | 0.60 | Energy     | TCA Cycle                             |
| N6-carbamoylthreonyladosine                   | 1.18 (0.91; 1.53) | 0.45 | 1.16 (0.88; 1.53) | 0.52 | 1.14 (0.86; 1.50) | 0.60 | Nucleotide | Purine Metabolism, Adenine containing |
| palmitoylcholine                              | 0.9 (0.71; 1.14)  | 0.60 | 0.89 (0.70; 1.14) | 0.59 | 0.90 (0.70; 1.14) | 0.62 | Lipid      | Fatty Acid Metabolism (Acyl Choline)  |
| kynurenate                                    | 1.1 (0.85; 1.42)  | 0.68 | 1.14 (0.86; 1.49) | 0.59 | 1.12 (0.85; 1.47) | 0.62 | Amino Acid | Tryptophan Metabolism                 |



|                                         |                   |      |                   |      |                   |      |              |                                                      |
|-----------------------------------------|-------------------|------|-------------------|------|-------------------|------|--------------|------------------------------------------------------|
| maltose                                 | 1.09 (0.86; 1.37) | 0.68 | 1.11 (0.87; 1.42) | 0.62 | 1.11 (0.87; 1.42) | 0.62 | Carbohydrate | Glycogen Metabolism                                  |
| sphingomyelin (d18:1/18:1, d18:2/18:0)  | 0.9 (0.7; 1.17)   | 0.68 | 0.89 (0.68; 1.17) | 0.62 | 0.89 (0.68; 1.16) | 0.62 | Lipid        | Sphingolipid Metabolism                              |
| eicosenoylcarnitine (C20:1)*            | 1.09 (0.85; 1.40) | 0.68 | 1.13 (0.87; 1.46) | 0.59 | 1.12 (0.86; 1.44) | 0.62 | Lipid        | Fatty Acid Metabolism (Acyl Carnitine)               |
| sphingomyelin (d18:2/16:0, d18:1/16:1)* | 0.92 (0.71; 1.19) | 0.69 | 0.89 (0.69; 1.17) | 0.62 | 0.90 (0.68; 1.17) | 0.63 | Lipid        | Sphingolipid Metabolism                              |
| phenylacetylglutamate                   | 0.91 (0.71; 1.15) | 0.67 | 0.91 (0.71; 1.17) | 0.68 | 0.90 (0.70; 1.16) | 0.63 | Peptide      | Acetylated Peptides                                  |
| N-acetylkynurenine (2)                  | 1.1 (0.84; 1.44)  | 0.68 | 1.12 (0.85; 1.47) | 0.62 | 1.11 (0.85; 1.47) | 0.64 | Amino Acid   | Tryptophan Metabolism                                |
| 1,5-anhydroglucitol (1,5-AG)            | 1.12 (0.87; 1.46) | 0.60 | 1.1 (0.84; 1.45)  | 0.69 | 1.09 (0.83; 1.43) | 0.75 | Carbohydrate | Glycolysis, Gluconeogenesis, and Pyruvate Metabolism |
| citrulline                              | 0.91 (0.71; 1.18) | 0.68 | 0.92 (0.71; 1.2)  | 0.75 | 0.92 (0.71; 1.20) | 0.75 | Amino Acid   | Urea Cycle; Arginine and Proline Metabolism          |
| pyroglutamine*                          | 1.10 (0.81; 1.50) | 0.69 | 1.12 (0.82; 1.52) | 0.69 | 1.11 (0.81; 1.50) | 0.75 | Amino Acid   | Glutamate Metabolism                                 |
| creatinine                              | 0.89 (0.65; 1.21) | 0.68 | 0.92 (0.67; 1.27) | 0.81 | 0.90 (0.65; 1.25) | 0.75 | Amino Acid   | Creatine Metabolism                                  |
| picolinate                              | 0.92 (0.71; 1.18) | 0.69 | 0.94 (0.73; 1.22) | 0.83 | 0.93 (0.71; 1.20) | 0.76 | Amino Acid   | Tryptophan Metabolism                                |
| sphingomyelin (d18:2/14:0, d18:1/14:1)* | 0.95 (0.72; 1.25) | 0.83 | 0.9 (0.67; 1.22)  | 0.71 | 0.92 (0.68; 1.23) | 0.76 | Lipid        | Sphingolipid Metabolism                              |
| dihomo-linoleoylcarnitine (C20:2)*      | 1.08 (0.85; 1.37) | 0.70 | 1.09 (0.85; 1.40) | 0.69 | 1.08 (0.84; 1.38) | 0.76 | Lipid        | Fatty Acid Metabolism (Acyl Carnitine)               |
| beta-hydroxyisovalerate                 | 1.09 (0.84; 1.41) | 0.69 | 1.09 (0.84; 1.42) | 0.71 | 1.08 (0.83; 1.40) | 0.77 | Amino Acid   | Leucine, Isoleucine and Valine Metabolism            |
| phenylacetylglutamine                   | 0.92 (0.73; 1.17) | 0.69 | 0.94 (0.74; 1.20) | 0.83 | 0.94 (0.74; 1.19) | 0.77 | Peptide      | Acetylated Peptides                                  |

|                                                     |                   |      |                   |      |                   |      |              |                                                  |
|-----------------------------------------------------|-------------------|------|-------------------|------|-------------------|------|--------------|--------------------------------------------------|
| 1-methyladenosine                                   | 1.07 (0.84; 1.37) | 0.72 | 1.06 (0.82; 1.36) | 0.83 | 1.07 (0.82; 1.38) | 0.81 | Nucleotide   | Purine Metabolism, Adenine containing            |
| indole-3-carboxylate                                | 1.06 (0.83; 1.35) | 0.80 | 1.06 (0.83; 1.36) | 0.83 | 1.06 (0.83; 1.36) | 0.81 | Amino Acid   | Tryptophan Metabolism                            |
| aspartate                                           | 1.09 (0.86; 1.39) | 0.68 | 1.05 (0.82; 1.34) | 0.86 | 1.05 (0.82; 1.34) | 0.88 | Amino Acid   | Alanine and Aspartate Metabolism                 |
| Urea                                                | 0.94 (0.72; 1.21) | 0.77 | 0.98 (0.75; 1.27) | 0.94 | 0.95 (0.73; 1.24) | 0.88 | Amino Acid   | Urea cycle; Arginine and Proline Metabolism      |
| 3-hydroxydecanoate                                  | 1.01 (0.8; 1.28)  | 0.96 | 1.04 (0.81; 1.33) | 0.89 | 1.04 (0.82; 1.34) | 0.88 | Lipid        | Fatty Acid, Monohydroxy                          |
| N-acetyltaurine                                     | 1.1 (0.85; 1.41)  | 0.68 | 1.06 (0.81; 1.38) | 0.83 | 1.05 (0.80; 1.37) | 0.88 | Amino Acid   | Methionine, Cysteine, SAM and Taurine Metabolism |
| beta-citrylglutamate                                | 0.97 (0.77; 1.23) | 0.91 | 0.96 (0.76; 1.23) | 0.90 | 0.96 (0.75; 1.22) | 0.88 | Amino Acid   | Glutamate Metabolism                             |
| mannitol/sorbitol                                   | 1.06 (0.83; 1.35) | 0.80 | 1.06 (0.82; 1.36) | 0.83 | 1.04 (0.81; 1.34) | 0.90 | Carbohydrate | Fructose, Mannose and Galactose Metabolism       |
| sphingomyelin (d17:1/16:0, d18:1/15:0, d16:1/17:0)* | 0.95 (0.74; 1.21) | 0.81 | 0.95 (0.74; 1.23) | 0.85 | 0.96 (0.75; 1.24) | 0.90 | Lipid        | Sphingolipid Metabolism                          |
| choline                                             | 0.99 (0.77; 1.28) | 0.96 | 0.97 (0.74; 1.27) | 0.94 | 0.96 (0.73; 1.27) | 0.90 | Lipid        | Phospholipid Metabolism                          |
| 3-methylcytidine                                    | 1.06 (0.83; 1.36) | 0.79 | 1.03 (0.79; 1.33) | 0.94 | 1.04 (0.80; 1.34) | 0.90 | Nucleotide   | Pyrimidine Metabolism, Cytidine containing       |
| 3-hydroxybutyrate (BHBA)                            | 0.96 (0.75; 1.21) | 0.83 | 0.97 (0.76; 1.23) | 0.93 | 0.97 (0.76; 1.23) | 0.90 | Lipid        | Ketone Bodies                                    |
| 6-oxopiperidine-2-carboxylate                       | 1.03 (0.81; 1.31) | 0.90 | 1.05 (0.82; 1.34) | 0.85 | 1.03 (0.80; 1.31) | 0.94 | Amino Acid   | Lysine Metabolism                                |
| 7-methylguanine                                     | 1.02 (0.79; 1.32) | 0.94 | 1.02 (0.79; 1.32) | 0.97 | 1.02 (0.79; 1.33) | 0.94 | Nucleotide   | Purine Metabolism, Guanine containing            |
| 3-hydroxy-3-methylglutarate                         | 0.98 (0.76; 1.26) | 0.94 | 1.00 (0.77; 1.29) | 0.98 | 0.98 (0.75; 1.27) | 0.94 | Lipid        | Mevalonate Metabolism                            |

|                                               |                   |      |                   |      |                   |      |                        |                                           |
|-----------------------------------------------|-------------------|------|-------------------|------|-------------------|------|------------------------|-------------------------------------------|
| isobutyrylglycine (C4)                        | 0.96 (0.75; 1.24) | 0.87 | 1.03 (0.79; 1.33) | 0.94 | 1.02 (0.79; 1.32) | 0.95 | Amino Acid             | Leucine, Isoleucine and Valine Metabolism |
| L-urobilin                                    | 0.99 (0.75; 1.31) | 0.96 | 0.98 (0.74; 1.3)  | 0.96 | 0.98 (0.74; 1.30) | 0.95 | Cofactors and Vitamins | Hemoglobin and Porphyrin Metabolism       |
| glycosyl-N-palmitoyl-sphingosine (d18:1/16:0) | 1.01 (0.80; 1.28) | 0.96 | 1.00 (0.79; 1.27) | 0.98 | 1.01 (0.80; 1.29) | 0.96 | Lipid                  | Ceramides                                 |
| 4-methoxyphenol sulfate                       | 0.97 (0.76; 1.23) | 0.90 | 0.99 (0.77; 1.26) | 0.97 | 0.99 (0.77; 1.26) | 0.97 | Amino Acid             | Tyrosine Metabolism                       |
| 3-aminoisobutyrate                            | 1.01 (0.79; 1.29) | 0.96 | 1.01 (0.79; 1.29) | 0.98 | 1.00 (0.78; 1.28) | 0.99 | Nucleotide             | Pyrimidine Metabolism, Thymine containing |
| guanidinoacetate                              | 0.99 (0.76; 1.28) | 0.96 | 1.01 (0.77; 1.32) | 0.98 | 1.00 (0.76; 1.31) | 0.99 | Amino Acid             | Creatine Metabolism                       |
| p-cresol glucuronide*                         | 0.99 (0.77; 1.25) | 0.96 | 1.01 (0.79; 1.29) | 0.98 | 1.00 (0.79; 1.28) | 0.99 | Amino Acid             | Tyrosine Metabolism                       |
| sphingomyelin (d18:1/19:0, d19:1/18:0)*       | 0.99 (0.77; 1.28) | 0.96 | 0.99 (0.76; 1.29) | 0.98 | 1.00 (0.77; 1.30) | 0.99 | Lipid                  | Sphingolipid Metabolism                   |
| phenylacetate                                 | 1.00 (0.78; 1.27) | 0.97 | 1.00 (0.79; 1.29) | 0.98 | 1.00 (0.79; 1.28) | 0.99 | Amino Acid             | Phenylalanine Metabolism                  |

Model 1: Poisson regression models included the individual metabolites, age, and sex. Model 2: Model 1 + smoking, education, family history of diabetes, METs of physical activity (physical activity score in BPRHS), waist circumference (cm), BMI (kg/m<sup>2</sup>), and alcohol consumption (g/day). Model 3: Model 2 + use of antihypertensive medications and statins or other lipid lowering medications. Benjamini-Hochberg FDR p-values were calculated for 104 metabolites.

**Supplemental Table S4.** Incidence Rate Ratios (95% confidence intervals) for progression to type 2 diabetes, according to 1 standard deviation change in each metabolite in the Boston Puerto Rican Health Study (BPRHS).

| Metabolite             | Model 1<br>IRR (95% CI) | FDR p-value | Model 2<br>IRR (95% CI) | FDR p-value | Model 3<br>IRR (95% CI) | FDR p-value | SUPER-PATHWAY | SUB-PATHWAY                               |
|------------------------|-------------------------|-------------|-------------------------|-------------|-------------------------|-------------|---------------|-------------------------------------------|
| 3-methyl-2-oxovalerate | 1.69 (1.25, 3.30)       | 0.05        | 1.77 (1.27; 2.46)       | 0.08        | 1.66 (1.19; 2.32)       | 0.31        | Amino Acid    | Leucine, Isoleucine and Valine Metabolism |

|                                             |                   |      |                   |      |                   |      |            |                                             |
|---------------------------------------------|-------------------|------|-------------------|------|-------------------|------|------------|---------------------------------------------|
| 3-methyl-2-oxobutyrate                      | 1.60 (1.20; 2.13) | 0.05 | 1.50 (1.11; 2.03) | 0.22 | 1.44 (1.07; 1.95) | 0.37 | Amino Acid | Leucine, Isoleucine and Valine Metabolism   |
| 4-methyl-2-oxopentanoate                    | 1.50 (1.10; 2.05) | 0.23 | 1.60 (1.14; 2.26) | 0.22 | 1.52 (1.08; 2.15) | 0.37 | Amino Acid | Leucine, Isoleucine and Valine Metabolism   |
| isoleucine                                  | 1.65 (1.22; 2.22) | 0.05 | 1.55 (1.12; 2.16) | 0.22 | 1.50 (1.09; 2.08) | 0.37 | Amino Acid | Leucine, Isoleucine and Valine Metabolism   |
| glycosyl-N-palmitoyl-sphingosine (d18:1/    | 1.21 (0.88; 1.67) | 0.23 | 1.38 (0.98; 1.94) | 0.84 | 1.55 (1.09; 2.19) | 0.37 | Lipid      | Ceramides                                   |
| 3-aminoisobutyrate                          | 0.79 (0.58; 1.08) | 0.65 | 0.82 (0.59; 1.14) | 0.94 | 0.89 (0.64; 1.23) | 0.47 | Nucleotide | Pyrimidine Metabolism, Thymine containing   |
| 1-palmitoyl-2-palmitoleoyl-GPC (16:0/16:1)* | 1.20 (0.90; 1.61) | 0.71 | 1.19 (0.87; 1.63) | 0.94 | 1.14 (0.83; 1.58) | 0.89 | Lipid      | Phosphatidylcholine (PC)                    |
| 5-oxoproline                                | 0.94 (0.70; 1.26) | 0.84 | 0.90 (0.67; 1.22) | 0.94 | 0.88 (0.64; 1.20) | 0.89 | Amino Acid | Glutathione Metabolism                      |
| 2-hydroxy-3-methylvalerate                  | 1.19 (0.88; 1.61) | 0.71 | 1.19 (0.85; 1.68) | 0.94 | 1.17 (0.83; 1.65) | 0.89 | Amino Acid | Leucine, Isoleucine and Valine Metabolism   |
| ornithine                                   | 0.95 (0.69; 1.32) | 0.87 | 0.73 (0.51; 1.04) | 0.84 | 0.71 (0.50; 1.03) | 0.89 | Amino Acid | Urea cycle; Arginine and Proline Metabolism |
| 3-hydroxyisobutyrate                        | 1.43 (1.04; 1.95) | 0.25 | 1.32 (0.93; 1.86) | 0.94 | 1.31 (0.92; 1.85) | 0.89 | Amino Acid | Leucine, Isoleucine and Valine Metabolism   |
| sphingomyelin (d18:1/20:1, d18:2/20:0)*     | 1.06 (0.79; 1.44) | 0.84 | 1.07 (0.77; 1.48) | 0.94 | 1.09 (0.78; 1.53) | 0.89 | Lipid      | Sphingolipid Metabolism                     |
| sphingomyelin (d18:2/24:2)*                 | 1.06 (0.77; 1.46) | 0.84 | 1.03 (0.74; 1.44) | 0.95 | 1.16 (0.83; 1.64) | 0.89 | Lipid      | Sphingolipid Metabolism                     |
| leucine                                     | 1.65 (1.19; 2.30) | 0.08 | 1.51 (1.05; 2.17) | 0.55 | 1.43 (1.00; 2.05) | 0.89 | Amino Acid | Leucine, Isoleucine and Valine Metabolism   |

|                                                     |                   |      |                   |      |                   |      |            |                                           |
|-----------------------------------------------------|-------------------|------|-------------------|------|-------------------|------|------------|-------------------------------------------|
| formiminoglutamate                                  | 1.23 (0.90; 1.68) | 0.71 | 1.02 (0.72; 1.45) | 0.98 | 0.93 (0.65; 1.34) | 0.89 | Amino Acid | Histidine Metabolism                      |
| 1-oleoyl-2-docosahexaenoyl-GPC (18:1/22:6)*         | 0.70 (0.52; 0.95) | 0.25 | 0.73 (0.53; 1.02) | 0.84 | 0.73 (0.52; 1.02) | 0.89 | Lipid      | Phosphatidylcholine (PC)                  |
| valine                                              | 1.39 (1.05; 1.84) | 0.25 | 1.22 (0.88; 1.69) | 0.94 | 1.15 (0.83; 1.60) | 0.89 | Amino Acid | Leucine, Isoleucine and Valine Metabolism |
| tyrosine                                            | 1.38 (1.02; 1.87) | 0.28 | 1.17 (0.84; 1.64) | 0.94 | 1.17 (0.83; 1.66) | 0.89 | Amino Acid | Tyrosine metabolism                       |
| 2-hydroxybutyrate/2-hydroxyisobutyrate              | 1.41 (1.03; 1.92) | 0.25 | 1.31 (0.93; 1.83) | 0.94 | 1.27 (0.90; 1.81) | 0.89 | Amino Acid | Glutathione Metabolism                    |
| 3-(4-hydroxyphenyl) lactate (HPLA)                  | 1.43 (1.04; 1.95) | 0.25 | 1.24 (0.88; 1.75) | 0.94 | 1.21 (0.86; 1.70) | 0.89 | Amino Acid | Tyrosine Metabolism                       |
| 2-aminoadipate                                      | 1.38 (1.02; 1.87) | 0.28 | 1.16 (0.86; 1.58) | 0.94 | 1.08 (0.78; 1.49) | 0.89 | Amino Acid | Lysine Metabolism                         |
| alpha-hydroxyisocaproate                            | 1.43 (1.03; 1.97) | 0.25 | 1.40 (0.96; 2.04) | 0.84 | 1.40 (0.95; 2.05) | 0.89 | Amino Acid | Leucine, Isoleucine and Valine Metabolism |
| imidazole lactate                                   | 0.79 (0.58; 1.06) | 0.62 | 0.87 (0.63; 1.19) | 0.94 | 0.86 (0.63; 1.18) | 0.89 | Amino Acid | Histidine Metabolism                      |
| docosadienoate (22:2n6)                             | 1.02 (0.76; 1.37) | 0.91 | 1.07 (0.76; 1.50) | 0.94 | 1.07 (0.77; 1.48) | 0.89 | Lipid      | Polyunsaturated Fatty Acid (n3 and n6)    |
| isovalerylglycine                                   | 0.90 (0.68; 1.18) | 0.82 | 0.91 (0.69; 1.20) | 0.94 | 0.93 (0.70; 1.23) | 0.89 | Amino Acid | Leucine, Isoleucine and Valine Metabolism |
| glycine                                             | 0.81 (0.59; 1.12) | 0.71 | 0.87 (0.62; 1.24) | 0.94 | 0.92 (0.65; 1.30) | 0.89 | Amino Acid | Glycine, Serine and Threonine Metabolism  |
| sphingomyelin (d18:1/22:2, d18:2/22:1, d16:1/24:2)* | 1.08 (0.79; 1.48) | 0.84 | 1.04 (0.76; 1.44) | 0.94 | 1.19 (0.85; 1.67) | 0.89 | Lipid      | Sphingolipid Metabolism                   |
| betaine                                             | 0.85 (0.62; 1.15) | 0.71 | 0.86 (0.61; 1.21) | 0.94 | 0.85 (0.60; 1.20) | 0.89 | Amino Acid | Glycine, Serine and Threonine Metabolism  |

|                                                     |                   |      |                   |      |                   |      |            |                                      |
|-----------------------------------------------------|-------------------|------|-------------------|------|-------------------|------|------------|--------------------------------------|
| indolelactate                                       | 1.21 (0.89; 1.65) | 0.71 | 1.21 (0.87; 1.69) | 0.94 | 1.19 (0.85; 1.66) | 0.89 | Amino Acid | Tryptophan Metabolism                |
| 2-linoleoylglycerol (18:2)                          | 1.09 (0.81; 1.46) | 0.84 | 1.22 (0.89; 1.67) | 0.94 | 1.19 (0.87; 1.63) | 0.89 | Lipid      | Monoacylglycerol                     |
| trimethylamine N-oxide                              | 1.13 (0.86; 1.49) | 0.75 | 1.12 (0.83; 1.51) | 0.94 | 1.07 (0.78; 1.45) | 0.89 | Lipid      | Phospholipid Metabolism              |
| hydantoin-5-propionate                              | 1.18 (0.88; 1.59) | 0.71 | 0.99 (0.73; 1.36) | 0.99 | 0.93 (0.68; 1.29) | 0.89 | Amino Acid | Histidine Metabolism                 |
| sphingomyelin (d18:2/23:0, d18:1/23:1, d17:1/24:1)* | 1.03 (0.76; 1.39) | 0.89 | 1.14 (0.83; 1.57) | 0.94 | 1.13 (0.82; 1.55) | 0.89 | Lipid      | Sphingolipid Metabolism              |
| sphingomyelin (d18:2/23:1)*                         | 1.16 (0.84; 1.60) | 0.75 | 1.14 (0.82; 1.58) | 0.94 | 1.22 (0.86; 1.72) | 0.89 | Lipid      | Sphingolipid Metabolism              |
| sphingomyelin (d18:2/21:0, d16:2/23:0)*             | 1.22 (0.88; 1.68) | 0.71 | 1.18 (0.83; 1.66) | 0.94 | 1.19 (0.83; 1.70) | 0.89 | Lipid      | Sphingolipid Metabolism              |
| docosahexaenoylcholine                              | 0.83 (0.62; 1.11) | 0.71 | 0.86 (0.63; 1.17) | 0.94 | 0.81 (0.59; 1.11) | 0.89 | Lipid      | Fatty Acid Metabolism (Acyl Choline) |
| arachidonoylcholine                                 | 0.84 (0.61; 1.15) | 0.72 | 0.93 (0.68; 1.27) | 0.94 | 0.87 (0.63; 1.20) | 0.89 | Lipid      | Fatty Acid Metabolism (Acyl Choline) |
| eicosenoate (20:1n9 or 1n11)                        | 0.92 (0.69; 1.23) | 0.84 | 0.93 (0.67; 1.28) | 0.94 | 0.90 (0.65; 1.25) | 0.89 | Lipid      | Long Chain Fatty Acid                |
| 1-palmitoleoyl-GPC* (16:1)*                         | 0.98 (0.73; 1.32) | 0.91 | 1.10 (0.82; 1.48) | 0.94 | 1.08 (0.80; 1.45) | 0.89 | Lipid      | Lysophospholipid                     |
| N6-acetyllysine                                     | 1.02 (0.73; 1.41) | 0.93 | 0.94 (0.66; 1.34) | 0.94 | 0.85 (0.59; 1.27) | 0.89 | Amino Acid | Lysine Metabolism                    |
| gamma-glutamylglycine                               | 0.86 (0.64; 1.16) | 0.72 | 0.91 (0.67; 1.24) | 0.94 | 0.93 (0.68; 1.27) | 0.89 | Peptide    | Gamma-glutamyl Amino Acid            |
| glycerol 3-phosphate                                | 1.07 (0.81; 1.43) | 0.84 | 1.12 (0.84; 1.49) | 0.94 | 1.10 (0.83; 1.47) | 0.89 | Lipid      | Glycerolipid Metabolism              |
| phenyllactate (PLA)                                 | 1.22 (0.87; 1.71) | 0.71 | 1.10 (0.77; 1.57) | 0.94 | 1.09 (0.75; 1.56) | 0.89 | Amino Acid | Phenylalanine Metabolism             |
| 5alpha-androstan-3beta,17alpha-diol disulfate       | 0.90 (0.65; 1.24) | 0.84 | 0.95 (0.68; 1.32) | 0.94 | 0.92 (0.66; 1.30) | 0.89 | Lipid      | Androgenic Steroids                  |
| N-acetylputrescine                                  | 1.20 (0.89; 1.62) | 0.71 | 1.22 (0.89; 1.67) | 0.94 | 1.22 (0.88; 1.68) | 0.89 | Amino Acid | Polyamine Metabolism                 |
| phosphate                                           | 1.03 (0.77; 1.39) | 0.88 | 1.14 (0.85; 1.54) | 0.94 | 1.17 (0.86; 1.58) | 0.89 | Energy     | Oxidative Phosphorylation            |

|                                                       |                   |      |                   |      |                   |      |              |                                                      |
|-------------------------------------------------------|-------------------|------|-------------------|------|-------------------|------|--------------|------------------------------------------------------|
| 1-palmitoleoyl-2-linolenoyl-GPC<br>(16:1/18)          | 1.08 (0.80; 1.45) | 0.84 | 1.21 (0.89; 1.64) | 0.94 | 1.16 (0.85; 1.57) | 0.89 | Lipid        | Phosphatidylcholine (PC)                             |
| phenylpyruvate                                        | 1.21 (0.89; 1.65) | 0.71 | 1.17 (0.85; 1.60) | 0.94 | 1.12 (0.82; 1.54) | 0.89 | Amino Acid   | Phenylalanine Metabolism                             |
| glycosyl-N-behenoyl-sphingadi-<br>enine (d18:2/22:0)* | 0.86 (0.63; 1.17) | 0.72 | 1.01 (0.73; 1.40) | 0.99 | 1.12 (0.80; 1.58) | 0.89 | Lipid        | Ceramides                                            |
| linoleoylcholine*                                     | 0.87 (0.64; 1.18) | 0.75 | 0.93 (0.68; 1.27) | 0.94 | 0.92 (0.67; 1.25) | 0.89 | Lipid        | Fatty Acid Metabolism (Acyl Choline)                 |
| stearoylcholine*                                      | 0.89 (0.66; 1.21) | 0.83 | 0.95 (0.70; 1.29) | 0.94 | 0.90 (0.66; 1.23) | 0.89 | Lipid        | Fatty Acid Metabolism (Acyl Choline)                 |
| sphingomyelin (d17:2/16:0,<br>d18:2/15:0)*            | 1.16 (0.86; 1.58) | 0.72 | 1.12 (0.81; 1.56) | 0.94 | 1.09 (0.78; 1.52) | 0.89 | Lipid        | Sphingolipid Metabolism                              |
| phenylalanine                                         | 1.42 (1.04; 1.94) | 0.25 | 1.22 (0.87; 1.71) | 0.94 | 1.23 (0.87; 1.74) | 0.89 | Amino Acid   | Phenylalanine metabolism                             |
| carnitine                                             | 0.84 (0.63; 1.13) | 0.71 | 0.88 (0.64; 1.21) | 0.94 | 0.80 (0.57; 1.11) | 0.89 | Lipid        | Carnitine metabolism                                 |
| fumarate                                              | 1.00 (0.73; 1.37) | 0.99 | 0.92 (0.65; 1.30) | 0.94 | 0.92 (0.65; 1.29) | 0.89 | Energy       | TCA Cycle                                            |
| palmitoylcholine                                      | 0.85 (0.62; 1.15) | 0.72 | 0.93 (0.68; 1.25) | 0.94 | 0.90 (0.66; 1.21) | 0.89 | Lipid        | Fatty Acid Metabolism (Acyl Choline)                 |
| kynurenate                                            | 1.25 (0.93; 1.69) | 0.65 | 1.11 (0.80; 1.53) | 0.94 | 1.08 (0.78; 1.50) | 0.89 | Amino Acid   | Tryptophan Metabolism                                |
| sphingomyelin (d18:1/18:1,<br>d18:2/18:0)             | 1.38 (0.98; 1.93) | 0.39 | 1.37 (0.97; 1.93) | 0.84 | 1.37 (0.96; 1.94) | 0.89 | Lipid        | Sphingolipid Metabolism                              |
| eicosenoylcarnitine (C20:1)*                          | 0.69 (0.52; 0.94) | 0.55 | 0.79 (0.57; 1.08) | 0.94 | 0.76 (0.55; 1.05) | 0.89 | Lipid        | Fatty Acid Metabolism (Acyl Carnitine)               |
| sphingomyelin (d18:2/16:0,<br>d18:1/16:1)*            | 1.11 (0.82; 1.52) | 0.83 | 1.06 (0.75; 1.49) | 0.94 | 1.09 (0.78; 1.52) | 0.89 | Lipid        | Sphingolipid Metabolism                              |
| N-acetylkynurenine (2)                                | 1.19 (0.88; 1.62) | 0.71 | 1.16 (0.84; 1.62) | 0.94 | 1.19 (0.85; 1.65) | 0.89 | Amino Acid   | Tryptophan Metabolism                                |
| 1,5-anhydroglucitol (1,5-AG)                          | 0.88 (0.62; 1.26) | 0.83 | 0.97 (0.67; 1.39) | 0.95 | 0.92 (0.64; 1.33) | 0.89 | Carbohydrate | Glycolysis, Gluconeogenesis, and Pyruvate Metabolism |

|                                                     |                   |      |                   |      |                   |      |                        |                                             |
|-----------------------------------------------------|-------------------|------|-------------------|------|-------------------|------|------------------------|---------------------------------------------|
| citrulline                                          | 0.93 (0.67; 1.28) | 0.84 | 0.96 (0.69; 1.34) | 0.94 | 0.88 (0.63; 1.23) | 0.89 | Amino Acid             | Urea Cycle; Arginine and Proline Metabolism |
| pyroglutamine*                                      | 0.91 (0.62; 1.34) | 0.84 | 0.94 (0.64; 1.39) | 0.94 | 0.89 (0.59; 1.33) | 0.89 | Amino Acid             | Glutamate Metabolism                        |
| picolinate                                          | 1.23 (0.90; 1.69) | 0.71 | 1.21 (0.87; 1.68) | 0.94 | 1.22 (0.89; 1.69) | 0.89 | Amino Acid             | Tryptophan Metabolism                       |
| sphingomyelin (d18:2/14:0, d18:1/14:1)*             | 1.20 (0.85; 1.68) | 0.72 | 1.13 (0.80; 1.59) | 0.94 | 1.08 (0.76; 1.53) | 0.89 | Lipid                  | Sphingolipid Metabolism                     |
| dihomo-linoleoylcarnitine (C20:2)*                  | 0.77 (0.56; 1.05) | 0.55 | 0.82 (0.59; 1.14) | 0.94 | 0.81 (0.58; 1.12) | 0.89 | Lipid                  | Fatty Acid Metabolism (Acyl Carnitine)      |
| 1-methyladenosine                                   | 1.32 (0.97; 1.78) | 0.43 | 1.22 (0.88; 1.68) | 0.94 | 1.19 (0.86; 1.65) | 0.89 | Nucleotide             | Purine Metabolism, Adenine containing       |
| aspartate                                           | 1.25 (0.93; 1.70) | 0.65 | 1.12 (0.82; 1.53) | 0.94 | 1.07 (0.78; 1.46) | 0.89 | Amino Acid             | Alanine and Aspartate Metabolism            |
| urea                                                | 0.95 (0.70; 1.27) | 0.84 | 0.89 (0.65; 1.22) | 0.94 | 0.86 (0.63; 1.17) | 0.89 | Amino Acid             | Urea cycle; Arginine and Proline Metabolism |
| 3-hydroxydecanoate                                  | 1.14 (0.84; 1.55) | 0.75 | 1.11 (0.80; 1.55) | 0.94 | 1.14 (0.81; 1.59) | 0.89 | Lipid                  | Fatty Acid, Monohydroxy                     |
| beta-citrylglutamate                                | 1.32 (0.99; 1.77) | 0.39 | 1.26 (0.92; 1.71) | 0.94 | 1.19 (0.87; 1.63) | 0.89 | Amino Acid             | Glutamate Metabolism                        |
| mannitol/sorbitol                                   | 1.02 (0.75; 1.40) | 0.91 | 0.96 (0.68; 1.35) | 0.94 | 0.90 (0.64; 1.26) | 0.89 | Carbohydrate           | Fructose, Mannose and Galactose Metabolism  |
| sphingomyelin (d17:1/16:0, d18:1/15:0, d16:1/17:0)* | 1.14 (0.85; 1.54) | 0.75 | 1.11 (0.80; 1.55) | 0.94 | 1.20 (0.85; 1.69) | 0.89 | Lipid                  | Sphingolipid Metabolism                     |
| choline                                             | 1.06 (0.78; 1.44) | 0.84 | 0.93 (0.67; 1.28) | 0.94 | 0.90 (0.64; 1.25) | 0.89 | Lipid                  | Phospholipid Metabolism                     |
| 6-oxopiperidine-2-carboxylate                       | 0.93 (0.69; 1.25) | 0.84 | 0.85 (0.62; 1.15) | 0.94 | 0.82 (0.60; 1.12) | 0.89 | Amino Acid             | Lysine Metabolism                           |
| L-urobilin                                          | 0.92 (0.65; 1.29) | 0.84 | 0.91 (0.64; 1.29) | 0.94 | 0.93 (0.65; 1.33) | 0.89 | Cofactors and Vitamins | Hemoglobin and Porphyrin Metabolism         |



|                                                     |                   |      |                   |      |                   |      |            |                                           |
|-----------------------------------------------------|-------------------|------|-------------------|------|-------------------|------|------------|-------------------------------------------|
| 4-methoxyphenol sulfate                             | 1.04 (0.78; 1.39) | 0.87 | 1.06 (0.80; 1.42) | 0.94 | 1.08 (0.81; 1.45) | 0.89 | Amino Acid | Tyrosine Metabolism                       |
| guanidinoacetate                                    | 0.83 (0.58; 1.19) | 0.72 | 0.91 (0.63; 1.32) | 0.94 | 0.92 (0.63; 1.35) | 0.89 | Amino Acid | Creatine Metabolism                       |
| p-cresol glucuronide*                               | 1.08 (0.80; 1.46) | 0.84 | 1.09 (0.79; 1.49) | 0.94 | 1.09 (0.79; 1.50) | 0.89 | Amino Acid | Tyrosine Metabolism                       |
| sphingomyelin (d18:1/19:0, d19:1/18:0)*             | 1.90 (0.88; 1.60) | 0.72 | 1.23 (0.90; 1.70) | 0.94 | 1.23 (0.88; 1.72) | 0.89 | Lipid      | Sphingolipid Metabolism                   |
| phenylacetate                                       | 1.12 (0.83; 1.51) | 0.83 | 1.08 (0.78; 1.49) | 0.94 | 1.13 (0.81; 1.57) | 0.89 | Amino Acid | Phenylalanine Metabolism                  |
| N6,N6,N6-trimethyllysine                            | 1.11 (0.80; 1.56) | 0.84 | 0.94 (0.64; 1.38) | 0.94 | 0.94 (0.64; 1.38) | 0.90 | Amino Acid | Lysine Metabolism                         |
| beta-hydroxyisovalerate                             | 1.08 (0.80; 1.47) | 0.84 | 1.06 (0.77; 1.46) | 0.94 | 1.06 (0.76; 1.46) | 0.90 | Amino Acid | Leucine, Isoleucine and Valine Metabolism |
| phenylacetylglutamine                               | 1.10 (0.81; 1.51) | 0.84 | 1.04 (0.76; 1.44) | 0.94 | 1.06 (0.76; 1.47) | 0.90 | Peptide    | Acetylated Peptides                       |
| indole-3-carboxylate                                | 1.09 (0.81; 1.47) | 0.84 | 1.06 (0.79; 1.41) | 0.94 | 1.06 (0.77; 1.45) | 0.90 | Amino Acid | Tryptophan Metabolism                     |
| alpha-hydroxyisovalerate                            | 0.94 (0.70; 1.27) | 0.84 | 0.94 (0.67; 1.32) | 0.94 | 0.95 (0.68; 1.33) | 0.91 | Amino Acid | Leucine, Isoleucine and Valine Metabolism |
| 7-methylguanine                                     | 1.12 (0.81; 1.55) | 0.83 | 1.04 (0.75; 1.45) | 0.94 | 1.05 (0.75; 1.48) | 0.91 | Nucleotide | Purine Metabolism, Guanine containing     |
| 2-palmitoleoyl-GPC* (16:1)*                         | 0.96 (0.72; 1.28) | 0.87 | 1.05 (0.78; 1.42) | 0.94 | 1.03 (0.76; 1.39) | 0.92 | Lipid      | Lysophospholipid                          |
| 3-methylglutaconate                                 | 1.05 (0.78; 1.42) | 0.84 | 1.06 (0.78; 1.46) | 0.94 | 1.02 (0.74; 1.41) | 0.92 | Amino Acid | Leucine, Isoleucine and Valine Metabolism |
| sphingomyelin (d18:1/22:1, d18:2/22:0, d16:1/24:1)* | 0.96 (0.72; 1.30) | 0.87 | 1.01 (0.71; 1.43) | 0.99 | 1.03 (0.73; 1.46) | 0.92 | Lipid      | Sphingolipid Metabolism                   |
| oleate/vaccenate (18:1)                             | 1.08 (0.80; 1.64) | 0.84 | 1.05 (0.75; 1.46) | 0.94 | 1.04 (0.74; 1.45) | 0.92 | Lipid      | Long Chain Fatty Acid                     |
| 1,2-dipalmitoyl-GPC (16:0/16:0)                     | 0.95 (0.70; 1.29) | 0.84 | 0.99 (0.71; 1.38) | 0.99 | 0.98 (0.70; 1.38) | 0.92 | Lipid      | Phosphatidylcholine (PC)                  |
| 5alpha-androstan-3alpha,17beta-diol disulfate       | 0.88 (0.62; 1.25) | 0.83 | 0.93 (0.64; 1.34) | 0.94 | 0.95 (0.65; 1.39) | 0.92 | Lipid      | Androgenic Steroids                       |

|                                |                   |      |                   |      |                   |      |              |                                                  |
|--------------------------------|-------------------|------|-------------------|------|-------------------|------|--------------|--------------------------------------------------|
| N6-carbamoylthreonyladenosine  | 1.11 (0.82; 1.52) | 0.83 | 1.00 (0.72; 1.38) | 0.99 | 0.96 (0.69; 1.33) | 0.92 | Nucleotide   | Purine Metabolism, Adenine containing            |
| maltose                        | 1.13 (0.86; 1.49) | 0.75 | 1.02 (0.76; 1.36) | 0.98 | 0.97 (0.73; 1.30) | 0.92 | Carbohydrate | Glycogen Metabolism                              |
| phenylacetylglutamate          | 1.06 (0.78; 1.43) | 0.84 | 1.02 (0.75; 1.39) | 0.97 | 1.02 (0.74; 1.41) | 0.92 | Peptide      | Acetylated Peptides                              |
| creatinine                     | 1.04 (0.72; 1.49) | 0.89 | 1.00 (0.68; 1.48) | 0.99 | 0.95 (0.64; 1.42) | 0.92 | Amino Acid   | Creatine Metabolism                              |
| N-acetyltaurine                | 1.07 (0.77; 1.50) | 0.84 | 1.13 (0.77; 1.64) | 0.94 | 1.02 (0.69; 1.52) | 0.92 | Amino Acid   | Methionine, Cysteine, SAM and Taurine Metabolism |
| 3-methylcytidine               | 1.07 (0.79; 1.46) | 0.84 | 1.07 (0.78; 1.46) | 0.94 | 1.03 (0.76; 1.40) | 0.92 | Nucleotide   | Pyrimidine Metabolism, Cytidine containing       |
| 3-hydroxybutyrate (BHBA)       | 0.95 (0.72; 1.26) | 0.84 | 0.99 (0.74; 1.33) | 0.99 | 0.98 (0.73; 1.32) | 0.92 | Lipid        | Ketone Bodies                                    |
| 3-hydroxy-3-methylglutarate    | 1.17 (0.85; 1.61) | 0.72 | 1.04 (0.73; 1.47) | 0.95 | 0.96 (0.67; 1.39) | 0.92 | Lipid        | Mevalonate Metabolism                            |
| isobutyrylglycine (C4)         | 0.95 (0.71; 1.27) | 0.84 | 0.96 (0.70; 1.31) | 0.94 | 0.98 (0.71; 1.35) | 0.92 | Amino Acid   | Leucine, Isoleucine and Valine Metabolism        |
| N-acetylglucosaminylasparagine | 1.16 (0.86; 1.55) | 0.72 | 1.05 (0.77; 1.42) | 0.94 | 1.01 (0.74; 1.38) | 0.95 | Carbohydrate | Aminosugar Metabolism                            |

Model 1: Poisson regression models included the individual metabolites, age and sex. Model 2: Model 1 + smoking, education, family history of diabetes, METs of physical activity (physical activity score in BPRHS), waist circumference (cm), BMI (kg/m<sup>2</sup>), and alcohol consumption (g/day). Model 3: Model 2 + use of antihypertensive medications and statins or other lipid lowering medications. Benjamini-Hochberg FDR p-values were calculated for 104 metabolites.

**Supplemental Table S5.** Incidence Rate Ratios (95% confidence intervals) for progression from prediabetes to type 2 diabetes, according to 1 standard deviation change in each metabolite, for select metabolites in the San Juan Overweight Adult Longitudinal Study (SOALS) and Boston Puerto Rican Health Study (BPRHS) cohorts.

| Metabolite             | Model 1<br>IRR (95% CI) | FDR p-value | Model 2<br>IRR (95% CI) | FDR p-value | Model 3<br>IRR (95% CI) | FDR p-value | SUPER-PATHWAY | SUB-PATHWAY                               |
|------------------------|-------------------------|-------------|-------------------------|-------------|-------------------------|-------------|---------------|-------------------------------------------|
| <b>SOALS</b>           |                         |             |                         |             |                         |             |               |                                           |
| 5-oxoproline           | 1.55 (1.19; 2.03)       | 0.04        | 1.61 (1.22; 2.13)       | 0.03        | 1.62 (1.22; 2.15)       | 0.03        | Amino Acid    | Glutathione Metabolism                    |
| 3-methyl-2-oxovalerate | 1.66 (1.19; 2.33)       | 0.05        | 1.83 (1.28; 2.61)       | 0.03        | 1.83 (1.28; 2.61)       | 0.03        | Amino Acid    | Leucine, Isoleucine and Valine Metabolism |

|                                             |                   |      |                   |      |                   |      |            |                                              |
|---------------------------------------------|-------------------|------|-------------------|------|-------------------|------|------------|----------------------------------------------|
| 2-hydroxy-3-methylvalerate                  | 1.80 (1.28; 2.52) | 0.04 | 1.78 (1.27; 2.50) | 0.03 | 1.78 (1.26; 2.50) | 0.03 | Amino Acid | Leucine, Isoleucine and Valine Metabolism    |
| 3-methyl-2-oxobutyr-ate                     | 1.60 (1.19; 2.13) | 0.04 | 1.66 (1.22; 2.24) | 0.03 | 1.66 (1.22; 2.25) | 0.03 | Amino Acid | Leucine, Isoleucine and Valine Metabolism    |
| ornithine                                   | 1.46 (1.12; 1.90) | 0.07 | 1.52 (1.15; 2.00) | 0.04 | 1.54 (1.17; 2.04) | 0.05 | Amino Acid | Urea cycle; Arginine and Pro-line Metabolism |
| 4-methyl-2-oxopenta-noate                   | 1.61 (1.15; 2.26) | 0.07 | 1.71 (1.20; 2.43) | 0.04 | 1.71 (1.20; 2.44) | 0.05 | Amino Acid | Leucine, Isoleucine and Valine Metabolism    |
| 1-palmitoyl-2-palmitoleoyl-GPC (16:0/16:1)* | 1.51 (1.18; 1.95) | 0.04 | 1.47 (1.14; 1.90) | 0.04 | 1.48 (1.14; 1.91) | 0.05 | Lipid      | Phosphatidylcholine (PC)                     |
| <b>BPRHS</b>                                |                   |      |                   |      |                   |      |            |                                              |
| 5-oxoproline                                | 0.98 (0.73; 1.32) | 0.97 | 0.94 (0.69; 1.27) | 0.99 | 0.91 (0.66; 1.26) | 0.98 | Amino Acid | Glutathione Metabolism                       |
| 3-methyl-2-oxovalerate                      | 1.60 (1.17; 2.18) | 0.20 | 1.6 (1.13; 2.26)  | 0.78 | 1.49 (1.05; 2.1)  | 0.98 | Amino Acid | Leucine, Isoleucine and Valine Metabolism    |
| 2-hydroxy-3-methylvalerate                  | 1.23 (0.9; 1.67)  | 0.84 | 1.15 (0.82; 1.63) | 0.99 | 1.14 (0.80, 1.61) | 0.98 | Amino Acid | Leucine, Isoleucine and Valine Metabolism    |
| 3-methyl-2-oxobutyr-ate                     | 1.49 (1.1; 2.03)  | 0.26 | 1.36 (1; 1.86)    | 0.90 | 1.28 (0.95; 1.74) | 0.98 | Amino Acid | Leucine, Isoleucine and Valine Metabolism    |
| ornithine                                   | 0.91 (0.65; 1.29) | 0.90 | 0.63 (0.43; 0.92) | 0.86 | 0.60 (0.40, 0.90) | 0.98 | Amino Acid | Urea cycle; Arginine and Pro-line Metabolism |
| 4-methyl-2-oxopenta-noate                   | 1.42 (1.03; 1.97) | 0.44 | 1.44 (1.01; 2.06) | 0.86 | 1.34 (0.94, 1.92) | 0.98 | Amino Acid | Leucine, Isoleucine and Valine Metabolism    |
| 1-palmitoyl-2-palmitoleoyl-GPC (16:0/16:1)* | 1.23 (0.9; 1.67)  | 0.84 | 1.18 (0.86; 1.63) | 0.99 | 1.08 (0.77, 1.51) | 0.98 | Lipid      | Phosphatidylcholine (PC)                     |

Model 1: Poisson regression models included the individual metabolites, age, and sex. Model 2: Model 1 + smoking, education, METs of physical activity (physical activity score in BPRHS), waist circumference, BMI (kg/m<sup>2</sup>), and alcohol consumption (g/day). Model 3: Model 2 + use of anti-hypertensive medications and statins or other lipid lowering medications. Benjamini-Hochberg FDR p-values were calculated for 104 metabolites.
